# Supplementary material
Source: publisher figshare collection journal article supplement (https://gsapubs.figshare.com/ndownloader/files/23291564)
Supplement: Supplementary file 1 [file 23291564]

**GSA Data Repository item 2011051**

**Supplementary Data and Discussion, Tables, Figures, and References**

Whiteside and Ward

**“Ammonoid diversity and disparity track episodes of chaotic carbon  
during the early Mesozoic”**

**Source of Diversity Data represented in Figure 1:** To reduce errors introduced by inaccurate global stratigraphic correlation, inconsistent taxonomy between regions, and monographic effects, we compiled a regional dataset of ammonoid diversity from western North America. To minimize discrepancy between taxonomic authorities, we endeavored to use ammonoid taxonomic compendia produced by a low number of individual taxonomists. This study was greatly aided in that all Triassic data presented here (the majority of taxa examined) were recognized and defined by a single worker (Tozer, 1994). Similarly, Permian ammonoid diversity and occurrences were compiled from Nassichuk (1970, 1971, 1977) and Miller et al., (1957). For the Jurassic, we collated data from Guex (1995), Guex et al. (2004), Pálffy et al. (1994), and Taylor (1998).

**Discussion of Isotopic Data in Figure 1:** The carbon isotopic curve displayed in Fig. 1 of the manuscript was comprised of data from Payne et al. (2004), Muttoni et al. (2004), and van de Schootbrugge et al. (2008). Currently, there is no available published carbonate data for most of the Carnian. Although published  $\delta^{13}\text{C}_{\text{carb}}$  data for the Rhaetian

of Queen Charlotte Islands, British Columbia exists (Ward et al., 2004), most if not all samples had been diagenetically altered, so we could not include this data. Furthermore, the limited stratigraphic sampling of an early Rhaetian  $\delta^{13}\text{C}_{\text{carb}}$  dataset from Austria (Krystyn et al., 2007) makes it difficult to correlate with any confidence to the Triassic timescale.

**Diversity Residuals Data and Discussion:** Generic diversity was plotted against number of occurrences for each time bin (Fig. DR1). A linear regression was calculated from these data and this was used to calculate the residuals for each diversity data point (Table DR1).

The predominance of positive and negative residuals, lack of values equal to zero, and low correlation coefficient ( $R^2=0.57$ ; Fig. DR1) indicate that sampling (number of occurrences) has a minimal effect on the shape of our diversity curve. In particular, the residual data indicate that the Early Triassic and Triassic-Jurassic boundary diversity minima and Middle-Late Triassic maxima are robust signals when accounting for sampling intensity.

**New  $\delta^{13}\text{C}_{\text{org}}$  Data Presented in Figure 2:** The late Norian data shown in Fig. 2 from the main text is based on three measured sections (Table DR2) sampled at 1-2 m intervals from Frederick Island, Queen Charlotte Islands, British Columbia, Canada.

In Fig. 2, section FI2 is dark red, section FI3 is green, and section FI4 is red. The three sections were correlated to each other using a local marker bed informally named the “FB limestone”, approximately 34 meters below the LAD of *Monotis*. These three

stratigraphic sections were placed in the greater Queen Charlotte Islands stratigraphy based on the presence of *Halobia* sp. and overlying well-bedded coquinas filled with *Monotis* spp. Ammonoids were exceedingly common over most of this interval (more common, in fact, than anywhere else on Frederick Island), where the lowest part of the continuous stratigraphic section is lower Norian in age based on ammonoids and bivalves. Within 10 m of the *Monotis* beds, however, there is a drastic fall-off of ammonoid abundance to near 0 in the lowest *Monotis* beds.

Samples for organic carbon  $^{13}\text{C}/^{12}\text{C}$  analysis were acidified with 20  $\mu\text{l}$  of 50% HCl to remove carbonate, oven-dried at 50 °C, and measured at the stable isotope laboratory at the University of Washington on a ThermoFinnigan DELTAplus mass spectrometer via a ThermoFinnigan CONFLO III interface. Values are corrected with standard methods and reported relative to the Vienna PDB. The analytical precision for this analysis, based on replicate analyses, is estimated at 0.08‰. Raw values are listed in Table DR2.

**Morphotype Data for Early Mesozoic Ammonoids of Western North America:** Each of the Upper Permian through Hettangian ammonoid genera examined for this study was identified as belonging to one of six morphotypes (Tables DR3-S4; Fig. DR2).

Oxycones are shells with high whorl expansion rate (W), low whorl shape (S), very low shell overlap (D), and short body chambers ( $<100^\circ$ ). All of these attributes are consistent with interpretations that these particular shell types had evolved to become strong and fast swimmers (Saunders et al., 1999). Normal shells have intermediate W, D, and S, and moderate to weak ornament; ornamented morphs display strong ornament (Jacobs et al.,

1994); serpenticones have low W, high D, variable sutures (S), extremely long body chambers ( $>180^\circ$ ), and low (or none) to only moderate ornamentation; and heteromorphs, which also have long body chambers but depart from normal planispiral ornamentation. In the Late Triassic and early Hettangian, the most common heteromorphic forms were either torted (snail like) or openly coiled forms that were both relatively small even as adults, and probably would have been poor swimmers (Ward, 1979; Fig. DR2). Depressed shells have intermediate to high W, intermediate D, and high S.

**Functional Redundancy as Applied to Post-Extinction Ecosystems:** Functional redundancy is when multiple taxa serve overlapping functions in the same ecosystem. This can include sharing similar trophic links with predators and prey. Modelling of both modern and fossil ecosystems demonstrate that ecosystems with high levels of redundancy are the most stable and resistant to perturbation, whereas ecosystems with little or no redundancy and few overlapping trophic links, are subject to cyclical variation and possible collapse (MacArthur, 1955; Roopnarine et al., 2007).

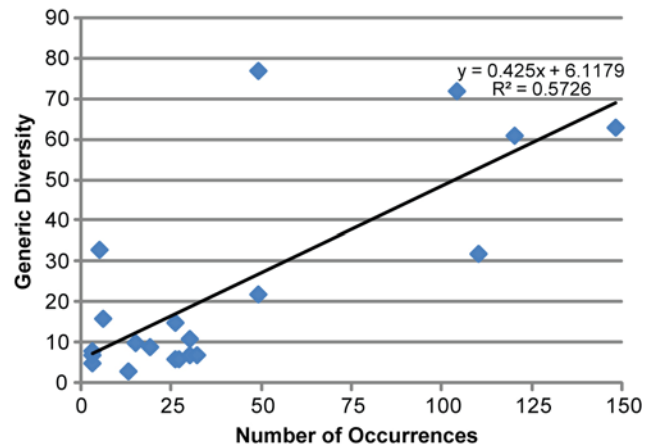

Figure DR1. Linear regression of generic diversity vs. number of occurrences. Each data point represents a single time bin in our analysis.

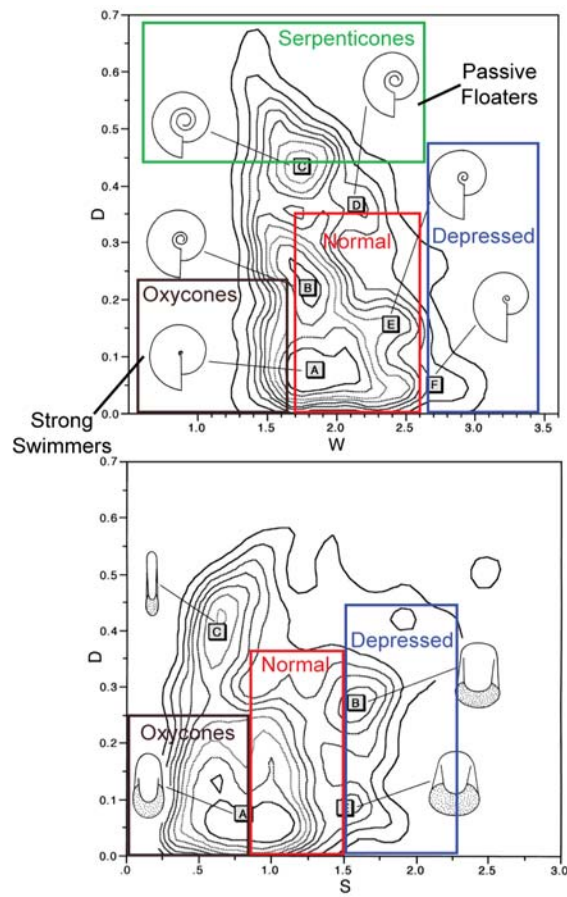

Figure DR2. Ammonoid morphotypes as represented by whorl expansion (W), whorl overlap (D), and whorl shape (S) morphospace [original figure from Saunders et al. (2004)]. Top, illustrations of modal geometries in ammonoid genera. Bottom, primary modal geometries shown in D-S density contours with representative apertural views.

Table DR1. Record of ammonoid generic level diversity and residual data for Pacific Coast of North America.

| <b>Time Bin</b>                      | <b>Raw Diversity</b> | <b>Occurrences</b> | <b>Diversity Residuals</b> |
|--------------------------------------|----------------------|--------------------|----------------------------|
| Lower Griesbachian                   | 7                    | 30                 | -4.27                      |
| Upper Griesbachian                   | 7                    | 32                 | -4.58                      |
| Lower Dienerian<br>(Candidus Zone)   | 6                    | 26                 | -4.02                      |
| Upper Dienerian<br>(Sverdrupi Zone)  | 11                   | 30                 | -2.83                      |
| Middle Smithian<br>(Romunderi Zone)  | 15                   | 26                 | -0.78                      |
| Upper Smithian (Tardus<br>Zone)      | 9                    | 19                 | -1.87                      |
| Lower Spathian<br>(Pilaticus Zone)   | 5                    | 3                  | -0.86                      |
| Upper Spathian<br>(Subcobustus Zone) | 6                    | 27                 | -4.17                      |
| Lower Anisian                        | 22                   | 49                 | -1.78                      |
| Upper Anisian                        | 77                   | 49                 | 18.01                      |
| Ladinian                             | 61                   | 120                | 1.40                       |
| Carnian                              | 32                   | 110                | -7.51                      |
| Lower Norian                         | 72                   | 104                | 7.80                       |
| Upper Norian                         | 63                   | 148                | -2.17                      |
| Rhaetian (Amoneum)                   | 10                   | 15                 | -0.90                      |
| Rhaetian<br>(Crickmayi)              | 3                    | 13                 | -3.11                      |
| Lowest Hettangian                    | 7                    | 3                  | -0.14                      |
| Lower Hettangian                     | 8                    | 3                  | 0.22                       |
| Upper Hettangian                     | 16                   | 6                  | 2.64                       |
| Sinemurian                           | 33                   | 5                  | 8.91                       |

Table DR2. Late Norian  $\delta^{13}\text{C}_{\text{org}}$  data from Frederick Island, Queen Charlotte Islands. Stratigraphic position is based on number of meters below the Triassic-Jurassic boundary. This boundary in the Queen Charlotte Islands is identified at a major turnover of radiolarian species, correlative with the top of the Crickmayi ammonoid zone (Ward et al., 2004). No values for standard deviation indicate there were not enough successful replicates to calculate this value. Abbreviations: TOC, total organic carbon.

| Section | Sample ID | Stratigraphic Position (m) | Average TOC | TOC Standard Deviation | $\delta^{13}\text{C}_{\text{org}}$ Average | $\delta^{13}\text{C}_{\text{org}}$ Standard Deviation |
|---------|-----------|----------------------------|-------------|------------------------|--------------------------------------------|-------------------------------------------------------|
| FI3     | 318       | -130.5                     | 0.068       |                        | -29.13                                     | 0.00                                                  |
| FI3     | 317       | -131.0                     | 0.055       | 0.021                  | -29.14                                     | 0.20                                                  |
| FI3     | 316       | -131.5                     | 0.124       |                        | -29.51                                     | 0.10                                                  |
| FI3     | 315       | -132.4                     | 0.042       | 0.017                  | -29.01                                     | 0.20                                                  |
| FI3     | 314       | -133.2                     | 0.039       | 0.018                  | -29.12                                     | 0.26                                                  |
| FI3     | 313       | -134.5                     | 0.047       | 0.019                  | -29.39                                     | 0.03                                                  |
| FI3     | 312       | -134.9                     | 0.059       | 0.025                  | -29.50                                     | 0.15                                                  |
| FI3     | 311       | -135.3                     | 0.056       | 0.024                  | -29.81                                     | 0.09                                                  |
| FI3     | 310       | -135.7                     | 0.043       | 0.021                  | -29.10                                     | 0.42                                                  |
| FI3     | 309       | -136.2                     | 0.038       | 0.020                  | -29.31                                     | 0.23                                                  |
| FI3     | 308       | -137.5                     | 0.054       | 0.025                  | -29.28                                     | 0.29                                                  |
| FI3     | 307       | -138.2                     | 0.084       | 0.017                  | -28.96                                     | 0.18                                                  |
| FI3     | 306       | -139.0                     | 0.064       | 0.031                  | -29.51                                     | 0.30                                                  |
| FI3     | 305       | -139.5                     | 0.050       | 0.019                  | -29.49                                     | 0.19                                                  |
| FI3     | 304       | -139.5                     | 0.068       | 0.034                  | -29.52                                     | 0.23                                                  |
| FI3     | 303       | -140.4                     | 0.023       | 0.016                  | -28.92                                     | 0.23                                                  |
| FI3     | 302       | -141.7                     | 0.042       | 0.018                  | -29.21                                     | 0.00                                                  |
| FI3     | 301       | -142.4                     | 0.045       | 0.011                  | -29.60                                     | 0.29                                                  |
|         |           |                            |             |                        |                                            |                                                       |
| FI4     | 21.5      | -143.3                     | 0.056       | 0.007                  | -29.71                                     | 0.21                                                  |
| FI4     | 26.5      | -145.3                     | 0.036       | 0.007                  | -28.93                                     | 0.35                                                  |
| FI4     | 29        | -146.5                     | 0.035       |                        | -28.75                                     |                                                       |
| FI4     | 33.5      | -148.0                     |             |                        |                                            |                                                       |
| FI4     | 36.5      | -149.2                     | 0.039       |                        | -28.48                                     |                                                       |
| FI4     | 38.5      | -150.2                     |             |                        |                                            |                                                       |
| FI4     | 39.5      | -150.6                     | 0.052       |                        | -28.54                                     |                                                       |
| FI4     | 44.5      | -152.6                     | 0.041       | 0.000                  |                                            |                                                       |
| FI4     | 45        | -152.8                     | 0.010       |                        | -28.42                                     |                                                       |
| FI4     | 49        | -154.5                     | -0.011      | 0.023                  | -28.00                                     | 0.44                                                  |
| FI4     | 54        | -156.5                     | 0.015       |                        |                                            |                                                       |
| FI4     | 58.2      | -158.4                     | -0.017      |                        |                                            |                                                       |
| FI4     | 58.6      | -158.6                     | 0.009       | 0.012                  | -28.59                                     | 0.28                                                  |
| FI4     | 59.5      | -159.0                     | 0.010       |                        |                                            |                                                       |



|     |       |        |        |       |        |      |
|-----|-------|--------|--------|-------|--------|------|
| FI4 | 60.1  | -159.4 | 0.004  |       | -28.87 |      |
| FI4 | 60.4  | -159.5 | 0.013  |       | -28.66 |      |
| FI4 | 60.7  | -159.7 |        |       |        |      |
| FI4 | 62    | -160.3 |        |       |        |      |
| FI4 | 63    | -160.8 | 0.004  |       | -28.32 |      |
| FI4 | 66    | -162.4 | 0.023  |       | -28.98 |      |
| FI4 | 68    | -163.6 | 0.011  |       | -29.76 |      |
| FI4 | 80    | -171.6 | 0.015  |       |        |      |
| FI4 | 81.3  | -172.4 | 0.043  |       | -29.76 |      |
| FI4 | 85    | -174.5 | 0.014  |       | -30.22 |      |
| FI4 | 86.6  | -175.4 | 0.003  |       | -28.09 |      |
| FI4 | 89.2  | -176.6 | 0.013  |       | -28.56 |      |
| FI4 | 92.4  | -178.1 |        |       |        |      |
| FI4 | 94.8  | -179.0 |        |       |        |      |
| FI4 | 98    | -180.6 | 0.016  |       | -28.04 |      |
| FI4 | 101   | -182.1 |        |       |        |      |
| FI4 | 103   | -183.0 | 0.037  | 0.006 | -27.84 | 0.16 |
| FI4 | 105   | -184.0 | 0.021  |       | -27.56 |      |
| FI4 | 108.7 | -185.8 | 0.019  | 0.001 | -27.84 | 0.40 |
| FI4 | 110.5 | -186.7 |        |       |        |      |
| FI4 | 111.1 | -186.9 | 0.032  |       | -28.16 |      |
| FI4 | 112   | -187.4 | 0.026  | 0.006 | -28.47 | 0.74 |
| FI4 | 113.5 | -188.0 | 0.015  |       | -28.05 |      |
| FI4 | 114.8 | -188.8 | 0.023  |       | -27.48 |      |
| FI4 | 115.9 | -189.3 | 0.033  |       | -28.19 |      |
| FI4 | 117.1 | -189.9 | 0.034  | 0.001 | -28.44 | 0.10 |
| FI4 | 118.4 | -190.5 | 0.007  | 0.001 | -29.02 | 0.22 |
| FI4 | 119.1 | -190.9 | 0.022  |       | -29.04 |      |
| FI4 | 120.9 | -191.8 | 0.013  | 0.000 | -29.27 | 0.10 |
| FI4 | 122.2 | -192.4 | 0.023  |       | -29.17 |      |
| FI4 | 123   | -192.8 |        |       |        |      |
| FI4 | 125.8 | -194.2 | 0.019  | 0.003 | -29.03 | 0.06 |
| FI4 | 126.8 | -194.7 | 0.032  | 0.001 | -29.02 | 0.09 |
| FI4 | 128.1 | -195.4 | 0.012  |       | -29.35 |      |
| FI4 | 128.3 | -195.5 |        |       |        |      |
| FI4 | 129.2 | -195.9 | -0.003 |       | -28.90 |      |
| FI4 | 129.8 | -196.2 | 0.013  |       | -28.92 |      |
| FI4 | 131.5 | -197.1 | 0.010  | 0.021 | -29.21 | 0.16 |
| FI4 | 134   | -198.3 | -0.013 |       | -29.32 |      |
| FI4 | 136   | -199.3 | 0.021  |       | -28.78 |      |
| FI4 | 138   | -200.3 | 0.002  |       | -29.19 |      |
| FI4 | 139.8 | -201.2 |        |       |        |      |
| FI4 | 142.6 | -202.7 | 0.045  |       | -29.09 |      |

|     |       |        |        |       |        |      |
|-----|-------|--------|--------|-------|--------|------|
| FI4 | 143.5 | -203.1 | 0.010  |       | -29.10 |      |
| FI4 | 144.3 | -203.5 | 0.010  |       | -29.09 |      |
| FI4 | 146.1 | -204.4 | 0.038  |       | -29.30 |      |
| FI4 | 148.3 | -205.6 | 0.029  | 0.009 | -28.98 | 0.16 |
| FI4 | 149.6 | -206.2 |        |       |        |      |
| FI4 | 150.8 | -206.8 | 0.017  |       | -28.41 |      |
| FI4 | 152   | -207.5 | 0.028  |       | -29.14 |      |
| FI4 | 154.2 | -208.6 | 0.038  | 0.000 | -29.42 | 0.04 |
| FI4 | 155.4 | -209.2 | 0.023  |       | -28.79 |      |
| FI4 | 156.1 | -209.5 | -0.017 |       | -28.41 |      |
| FI4 | 157.1 | -209.6 | 0.004  | 0.002 | -28.68 | 0.04 |
| FI4 | 159.2 | -210.3 | 0.001  |       | -28.83 |      |
| FI4 | 161   | -210.8 |        |       |        |      |
| FI4 | 164.2 | -211.8 | 0.012  |       | -28.94 |      |
| FI4 | 165.9 | -212.4 | 0.029  |       | -28.95 |      |
| FI4 | 167.9 | -213.2 | 0.004  |       | -28.57 |      |
| FI4 | 169.5 | -213.8 | 0.049  |       | -28.94 |      |
| FI4 | 171.5 | -214.7 | 0.014  | 0.004 | -28.80 | 0.05 |
| FI4 | 174   | -215.8 | 0.004  | 0.016 | -28.27 | 0.02 |
| FI4 | 175.8 | -216.5 | 0.009  |       | -28.29 |      |
| FI4 | 177.8 | -217.3 | 0.058  | 0.006 | -28.78 | 0.05 |
| FI4 | 179   | -217.7 | -0.006 | 0.007 | -28.54 | 0.05 |
| FI4 | 180   | -218.1 | 0.005  | 0.007 | -28.46 | 0.06 |
|     |       |        |        |       |        |      |
| FI2 | 225   | -175.3 | 0.046  | 0.009 | -28.75 | 0.33 |
| FI2 | 224   | -176.3 | 0.038  | 0.005 | -28.91 | 0.44 |
| FI2 | 223   | -177.0 | 0.026  | 0.005 | -28.86 | 0.18 |
| FI2 | 222   | -177.6 | 0.032  | 0.005 | -28.91 | 0.53 |
| FI2 | 221   | -177.8 | 0.026  | 0.005 | -28.66 | 0.18 |
| FI2 | 220   | -179.5 | 0.034  | 0.006 | -29.01 | 0.39 |
| FI2 | 201   | -180.3 | 0.018  | 0.002 | -28.64 | 0.27 |
| FI2 | 202   | -181.3 | 0.020  | 0.003 | -28.30 | 0.13 |
| FI2 | 203   | -181.9 | 0.043  | 0.006 | -28.83 | 0.22 |
| FI2 | 204   | -182.3 | 0.045  | 0.007 | -28.64 | 0.24 |
| FI2 | 205   | -182.9 | 0.034  | 0.005 | -28.53 | 0.24 |
| FI2 | 207   | -183.8 | 0.033  |       | -27.89 |      |
| FI2 | 208   | -184.2 | 0.045  | 0.015 | -27.81 | 0.30 |
| FI2 | 209   | -184.7 | 0.054  | 0.006 | -27.97 | 0.22 |
| FI2 | 210   | -185.1 | 0.042  | 0.004 | -27.84 | 0.17 |
| FI2 | 211   | -185.8 | 0.042  | 0.006 | -27.67 | 0.15 |
| FI2 | 212   | -186.2 | 0.019  | 0.004 | -27.64 | 0.09 |
| FI2 |       | -186.2 | 0.030  | 0.011 | -28.05 | 0.67 |
| FI2 | 213   | -186.5 | 0.034  | 0.004 | -28.11 | 0.19 |

|     |     |        |       |       |        |      |
|-----|-----|--------|-------|-------|--------|------|
| FI2 | 214 | -187.2 | 0.025 | 0.004 | -27.88 | 0.07 |
| FI2 | 215 | -187.9 | 0.043 | 0.010 | -28.15 | 0.21 |
| FI2 | 216 | -188.2 | 0.049 | 0.008 | -27.68 | 0.19 |
| FI2 | 217 | -188.7 | 0.019 | 0.004 | -27.37 | 0.23 |
| FI2 | 218 | -188.9 | 0.052 | 0.004 | -28.47 | 0.13 |
| FI2 | 227 | -190.5 | 0.035 | 0.005 | -28.14 | 0.20 |
| FI2 | 228 | -191.6 | 0.020 | 0.006 | -28.99 | 0.26 |
| FI2 | 229 | -192.3 | 0.034 | 0.003 | -28.58 | 0.15 |
| FI2 | 230 | -193.2 | 0.045 | 0.006 | -28.47 | 0.42 |
| FI2 | 231 | -193.9 | 0.026 | 0.032 | -29.06 | 0.34 |
| FI2 | 232 | -195.1 | 0.032 | 0.017 | -29.25 | 0.00 |
| FI2 | 233 | -195.8 | 0.026 | 0.002 | -29.26 | 0.20 |
| FI2 | 234 | -196.3 | 0.045 | 0.002 | -29.10 | 0.35 |
| FI2 | 235 | -196.9 | 0.028 | 0.003 | -29.28 | 0.32 |
| FI2 | 236 | -197.3 | 0.038 | 0.012 | -29.50 | 0.16 |
| FI2 | 237 | -197.6 | 0.041 | 0.021 | -29.29 | 0.15 |
| FI2 | 238 | -197.9 | 0.035 | 0.017 | -28.94 | 0.47 |
| FI2 | 239 | -197.8 | 0.018 |       | -29.17 |      |
| FI2 | 240 | -198.6 | 0.076 | 0.018 | -29.26 | 0.27 |
| FI2 | 241 | -198.8 | 0.055 | 0.030 | -28.97 | 0.68 |
| FI2 | 251 | -201.5 | 0.030 | 0.013 | -28.50 | 0.35 |
| FI2 | 252 | -202.3 | 0.057 | 0.029 | -28.88 | 0.66 |
| FI2 | 253 | -203.3 | 0.047 | 0.021 | -29.03 | 0.42 |
| FI2 | 254 | -204.4 |       |       |        |      |
| FI2 | 255 | -205.2 | 0.046 | 0.012 | -29.05 | 0.24 |
| FI2 | 256 | -206.0 | 0.047 | 0.022 | -28.91 | 0.55 |
| FI2 | 257 | -206.7 | 0.050 | 0.026 | -28.74 | 0.71 |
| FI2 | 258 | -207.9 | 0.055 | 0.024 | -28.73 | 0.67 |

Table DR3. Specific attributes for each morphotype defined in this paper.

| Shell<br>coiling<br>descriptors<br>(W,D,S) | <b>Oxycone</b> | <b>Normal</b> | <b>Depressed</b> | <b>Ornamented</b> | <b>Serpenticone</b> | <b>Heteromorphic</b> |
|--------------------------------------------|----------------|---------------|------------------|-------------------|---------------------|----------------------|
| W                                          | 1.3-3          | 1.5- 2.5      | 1.3-3            | Any               | 1.2-2.0             | Any                  |
| D                                          | 0-.2           | .2-.5         | .1-.5            | Any               | .4-.7               | NA                   |
| S                                          | 0-.5           | .6-1.6        | 1.2-2.5          | Any               | .5-1.5              | any                  |

Table DR4. Number of genera assigned to each morphotype from the earliest Triassic through the Early Jurassic.

|                           | Oxycone | Normal | Depressed | Ornamented | Serpenticone | Heteromorph |
|---------------------------|---------|--------|-----------|------------|--------------|-------------|
| <b>Lower Griesbachian</b> | 4       | 1      | 0         | 0          | 2            | 0           |
| <b>Upper Griesbachian</b> | 4       | 3      | 0         | 0          | 0            | 0           |
| <b>Lower Dienerian</b>    | 4       | 2      | 0         | 0          | 0            | 0           |
| <b>Upper Dienerian</b>    | 7       | 4      | 0         | 0          | 0            | 0           |
| <b>Lower Smithian</b>     | 7       | 4      | 2         | 0          | 2            | 0           |
| <b>Upper Smithian</b>     | 1       | 5      | 0         | 2          | 1            | 0           |
| <b>Lower Spathian</b>     | 2       | 2      | 1         | 0          | 0            | 0           |
| <b>Upper Spathian</b>     | 3       | 2      | 0         | 0          | 1            | 0           |
| <b>Lower Anisian</b>      | 14      | 5      | 1         | 2          | 0            | 0           |
| <b>Upper Anisian</b>      | 24      | 12     | 10        | 25         | 6            | 0           |
| <b>Ladinian</b>           | 21      | 8      | 8         | 20         | 4            | 0           |
| <b>Carnian</b>            | 10      | 5      | 2         | 11         | 4            | 0           |
| <b>Lower Norian</b>       | 26      | 7      | 2         | 10         | 2            | 0           |
| <b>Upper Norian</b>       | 21      | 5      | 5         | 16         | 5            | 0           |
| <b>Lower Rhaetian</b>     | 1       | 3      | 1         | 2          | 0            | 3           |
| <b>Upper Rhaetian</b>     | 0       | 2      | 0         | 0          | 0            | 1           |
| <b>Lower Hettangian</b>   | 12      | 1      | 0         | 2          | 0            | 2           |
| <b>Upper Hettangian</b>   | 0       | 1      | 0         | 0          | 6            | 1           |
| <b>Sinemurian</b>         | 2       | 2      | 1         | 0          | 5            | 0           |

## References

- Guex, J., 1995, Ammonites hettangiennes de la Gabbs Valley Range (Nevada, USA):  
Mémoires de Géologie (Lausanne), v. 27, p. 1-131.
- Guex J., Bartolini, A., Atudorei, V., and Taylor, D., 2004, High-resolution ammonite and  
carbon isotope stratigraphy across the Triassic- Jurassic boundary at New Cork  
Canyon (Nevada): Earth and Planetary Science Letters , v. 225, p. 29–41.
- Jacobs, D., Landman, N., and Chamberlain, J., 1994, Ammonite shell shape covaries with  
facies and hydrodynamics: Iterative evolution as a response to changes in basinal  
environment: Geology v. 22, p. 905-908.
- Krystyn, L., Richoz, S., Gallet, Y., Bouquerei, H., and Kürschner, W., 2007, Updated  
bio- and magnetostratigraphy from Steinbergkogel (Austria), candidate GSSP for the  
base of the Rhaetian stage: Albertiana, v. 36, p. 164-173.
- MacArthur, R., 1955, Fluctuations of animal populations and a measure of community  
stability: Ecology, v. 36, p. 533-536.
- Miller, A.K., Furnish, W.M., and Clark, D.L., 1957, Permian ammonoids from western  
United States: Journal of Paleontology, v. 31, p. 1057-1068.
- Muttoni, G., Kent, D.V., Olsen, P.E., Distefano, P., Lowrie, W., Bernasconi, S., and  
Hernandez, F.M., 2004, Tethyan magnetostratigraphy from Pizzo Mondello (Sicily)  
and correlation to the Late Triassic Newark astrochronological polarity time scale:  
Geological Society of America Bulletin 116, p.1043-1058.
- Nassichuk, W.W., 1970, Permian ammonoids from Devon and Melville Islands,  
Canadian Arctic Archipelago: Journal of Paleontology, v. 44, p. 77-97.
- Nassichuk, W.W., 1971, Permian ammonoids and nautiloids, southeastern Eagle Plain,

- Yukon Territory: *Journal of Paleontology*, v. 45, p. 1001-1021.
- Nassichuk, W.W., 1977, Upper Permian ammonoids from the Cache Creek Group in western Canada: *Journal of Paleontology*, v. 51, p. 557-590.
- Pálffy, J., Smith, P.L., and Tipper, H.W., 1994, Sinemurian (Lower Jurassic) ammonoid biostratigraphy of the Queen Charlotte Islands, western Canada: *Geobios*, v. 17, p. 385-393.
- Payne, J.L., Lehrmann, D.J., Wei, J., Orchard, M.J., Schrag, D.P., and Knoll, A.H., 2004, Large perturbations of the carbon cycle during recovery from the end-Permian extinction: *Science*, v. 305, p. 506-509.
- Roopnarine, P.D., Angielczyk, K.D., Wang, S.C., and Hertog, R., 2007, Trophic network models explain instability of Early Triassic terrestrial communities: *Proceedings of the Royal Society B: Biological Sciences*, v. 274, no. 1622, p. 2077-2086.  
doi:10.1098/rspb.2007.0515.
- Saunders, W.B., Work, D.M., and Nikolaeva, S.V., 1999, Evolution of complexity in Paleozoic ammonoid sutures: *Science*, v. 286, p. 760-763.
- Saunders, W.B., Work, D.M., and Nikolaeva, S.V., 2004, The evolutionary history of shell geometry in Paleozoic ammonoids: *Paleobiology* v. 30, p. 19-43.
- Taylor, D.G., 1998, Late Hettangian-Early Sinemurian (Jurassic) ammonite biochronology of the Western Cordillera, United States: *Geobios*, v. 31, p. 467-497.
- Tozer, T., 1994, Canadian Triassic ammonoid faunas: *Geological Survey of Canada Bulletin* 467, 663p.
- van de Schootbrugge, B., Payne, J.L., Tomasovych, A., Pross, J., Fiebig, J., Benbrahim, M., Föllmi, K.B., and Quan, T.M., 2008, Carbon cycle perturbation and stabilization

in the wake of the Triassic-Jurassic boundary mass-extinction event: Geochemistry, Geophysics, Geosystems v. 9, doi: 10.1029/2007GC001914.

Ward, P., 1979, Functional morphology of Cretaceous helically-coiled ammonite shells: Paleobiology v. 5, p. 415-422.

Ward, P.D., Garrison, G.H., Haggart, J.W., Kring, D.A., and Beattie, M.J., 2004, Isotopic evidence bearing on Late Triassic extinction events, Queen Charlotte Islands, British Columbia, and implications for the duration and cause of the Triassic/Jurassic mass extinction: Earth and Planetary Science Letters, v. 224, p. 589-600.
